# Supplementary material for: Cathepsin G Induces Cell Aggregation of Human Breast Cancer MCF-7 Cells via a 2-Step Mechanism: Catalytic Site-Independent Binding to the Cell Surface and Enzymatic Activity-Dependent Induction of the Cell Aggregation
Source: Hindawi journal article supplement (doi:10.1155/2012/456462), 2012-01-01

# Supplementary fig. 1

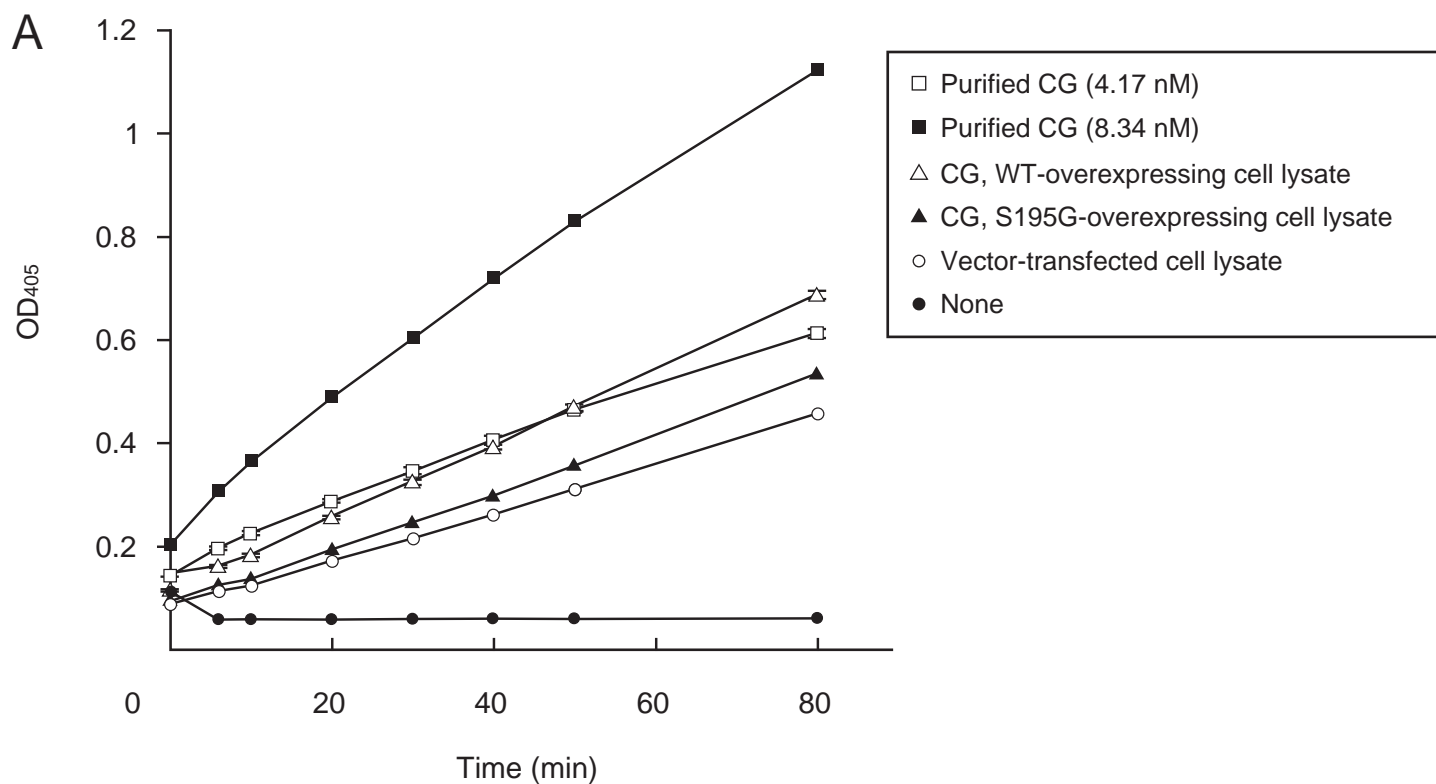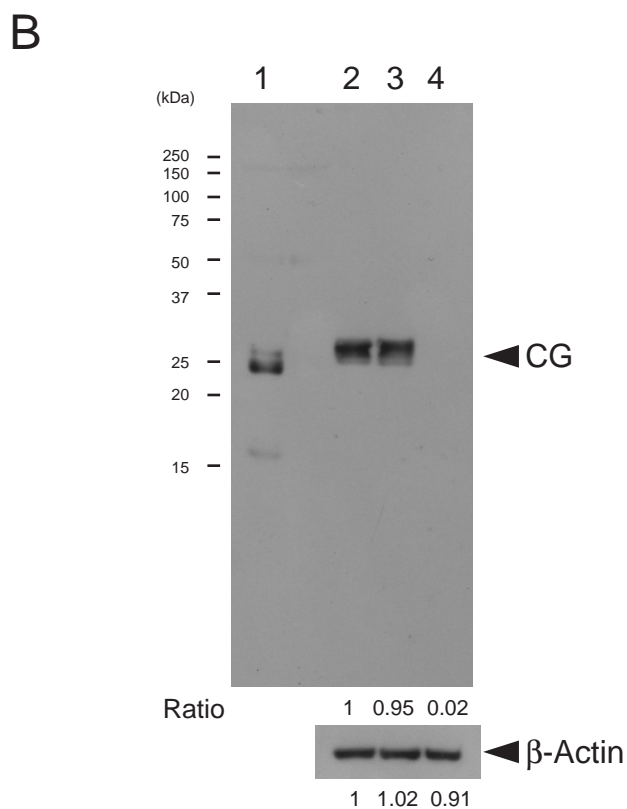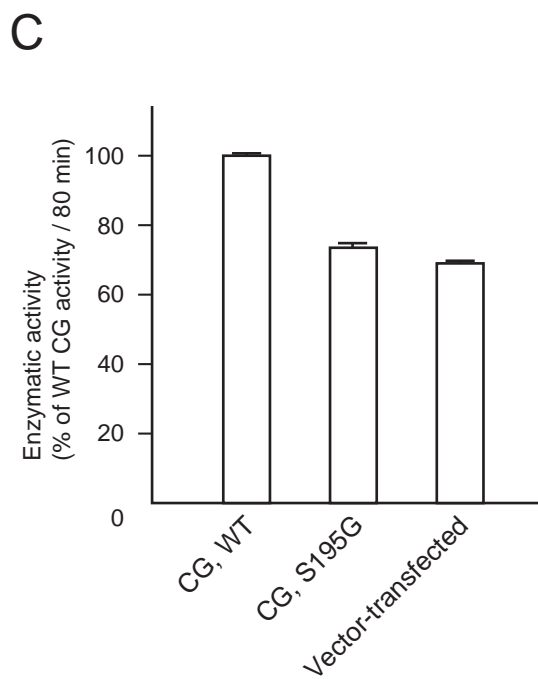

## Supplementary fig. 2

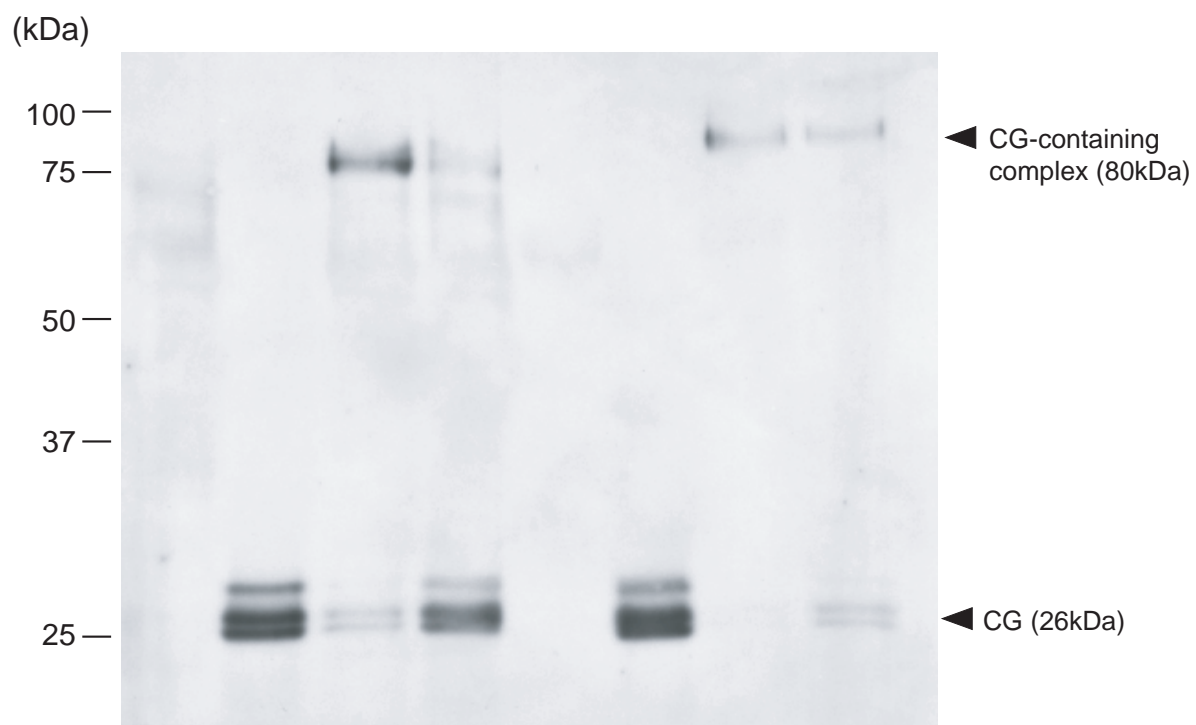

|                    |      |      |      |      |     |      |      |      |
|--------------------|------|------|------|------|-----|------|------|------|
| CG (pmol)          | -    | 1.67 | 1.67 | 1.67 | -   | 1.67 | 1.67 | 1.67 |
| AT (pmol)          | 90.9 | -    | 90.9 | 90.9 | -   | -    | -    | -    |
| ACT (pmol)         | -    | -    | -    | -    | 1.5 | -    | 1.5  | 1.5  |
| Chymostatin (pmol) | -    | -    | -    | 661  | -   | -    | -    | 661  |

# Supplementary fig. 3

## A PAR-1 agonist

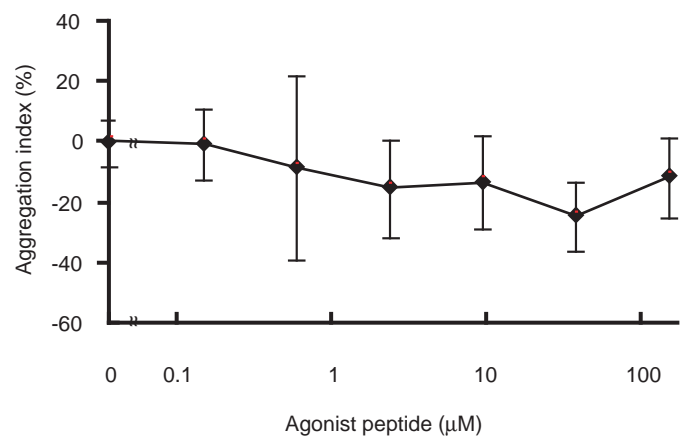

## B PAR-2 agonist

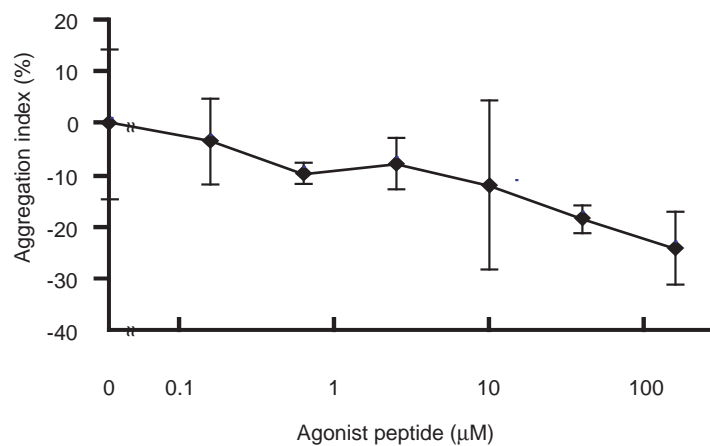

## C PAR-4 agonist

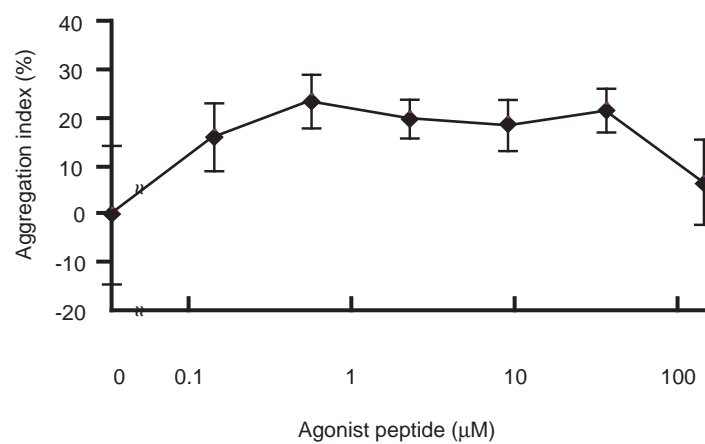

# Supplementary fig. 4

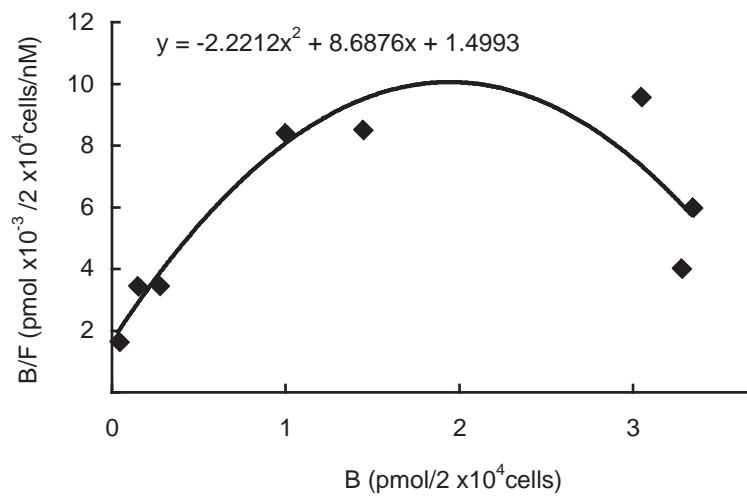

Supplement: f1 [file 456462.f1.pdf]
